# Supplementary material
Source: publisher figshare collection journal article supplement (https://acs.figshare.com/ndownloader/files/10784720)
Supplement: Supplementary file 1 [file 10784720]

## SUPPORTING INFORMATION

# Opening Magnesium Storage Capability of Two-Dimensional MXene by Intercalation of Cationic Surfactant

Min Xu,<sup>Δ†‡</sup> Shulai Lei,<sup>Δ†</sup> Jing Qi,<sup>‡</sup> Qingyun Dou,<sup>†,¶</sup> Lingyang Liu,<sup>†,¶</sup> Yulan Lu,<sup>‡</sup>

Qing Huang,<sup>†,§</sup> Siqi Shi,<sup>†,¶</sup> and Xingbin Yan<sup>\*†</sup>

<sup>†</sup>Laboratory of Clean Energy Chemistry and Materials, State Key Laboratory of Solid Lubrication, Lanzhou Institute of Chemical Physics, Chinese Academy of Sciences, Lanzhou 730000, P. R. China

<sup>‡</sup>School of Physical Science and Technology, Lanzhou University, Lanzhou 730000, China

<sup>¶</sup>University of Chinese Academy of Sciences, Beijing 100039, P.R. China

<sup>§</sup>Division of Functional Materials and Nano-Devices, Ningbo Institute of Material Technology and Engineering, Chinese Academy of Science, Ningbo 315201, P.R. China

<sup>¶</sup>School of Materials Science and Engineering, Shanghai University, Shanghai 200444, P.R. China

<sup>Δ</sup> Contributed equally to this work

\* The corresponding author. E-mail: [xbyan@licp.cas.cn](mailto:xbyan@licp.cas.cn)

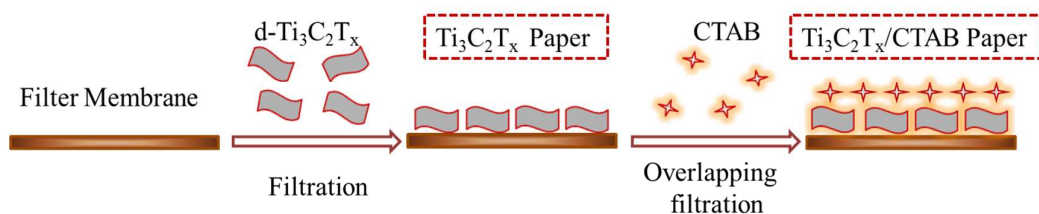

**Figure S1** The formation process of freestanding Ti<sub>3</sub>C<sub>2</sub>T<sub>x</sub> and Ti<sub>3</sub>C<sub>2</sub>T<sub>x</sub>/CTAB papers by vacuum filtration method.

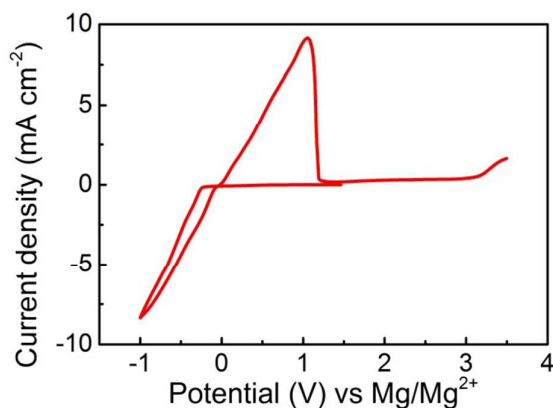

**Figure S2.** Typical CV curve (at a scan rate of 5 mV s<sup>-1</sup>) of 0.4 M (PhMgCl)<sub>2</sub>-AlCl<sub>3</sub>/THF (APC) electrolyte using a platinum foil as the working electrode, two freshly polished magnesium ribbons as the reference and counter electrodes. The APC electrolyte was prepared by following the steps of the literature (*Advanced Materials* **2007**, *19*, 4260-4267).

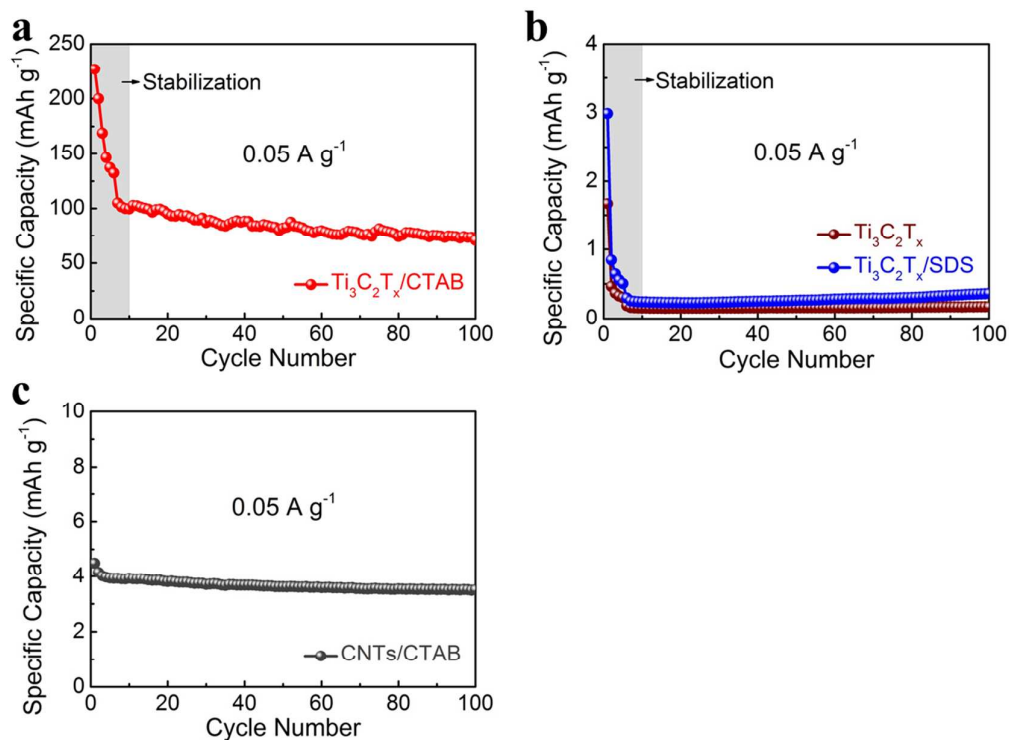

**Figure S3.** The discharge capacity as a function of cycle number at 0.05 A g<sup>-1</sup> for (a)  $\text{Ti}_3\text{C}_2\text{T}_x/\text{CTAB}$  electrode, (b)  $\text{Ti}_3\text{C}_2\text{T}_x$  and  $\text{Ti}_3\text{C}_2\text{T}_x/\text{SDS}$  electrodes and (c)  $\text{CNTs}/\text{CTAB}$  electrode. The gray parts were the stabilization (first at 0.02 A g<sup>-1</sup> for 6 cycles and then at 0.05 A g<sup>-1</sup> for 4 cycles) process.

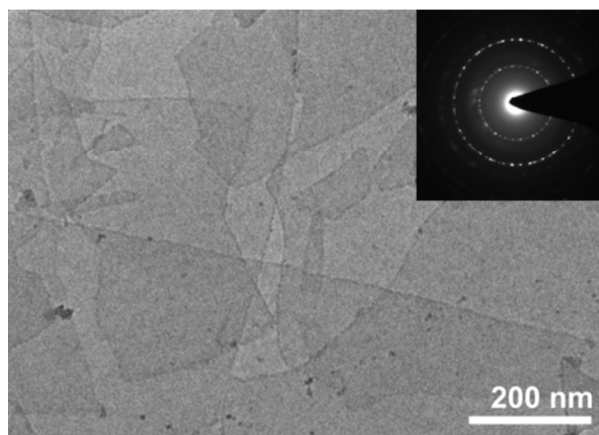

**Figure S4.** TEM image of  $\text{Ti}_3\text{C}_2\text{T}_x$  flakes. Inset shows the selected area electron diffraction pattern.

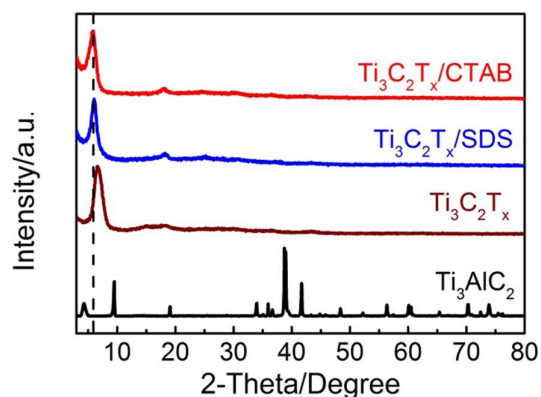

**Figure S5.** XRD patterns of powdery  $\text{Ti}_3\text{AlC}_2$ , paper-like  $\text{Ti}_3\text{C}_2\text{T}_x$ ,  $\text{Ti}_3\text{C}_2\text{T}_x/\text{SDS}$  and  $\text{Ti}_3\text{C}_2\text{T}_x/\text{CTAB}$  samples.

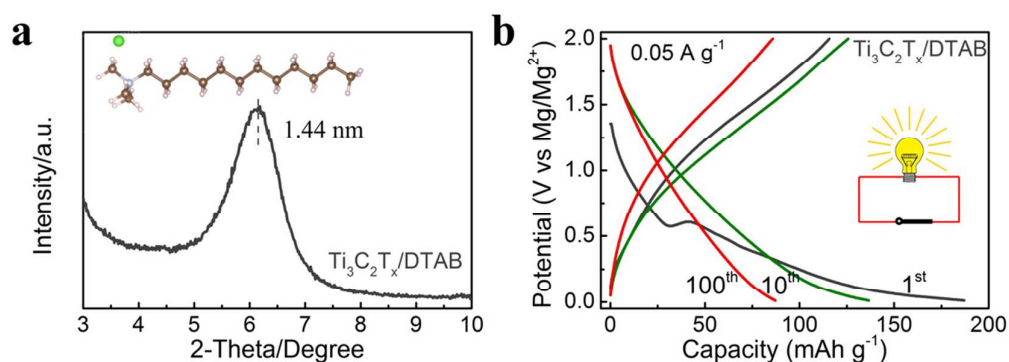

**Figure S6** a) XRD pattern of  $\text{Ti}_3\text{C}_2\text{T}_x/\text{DTAB}$  sample. Inset showing the structure schematic of DTAB. b) GCD curves of  $\text{Ti}_3\text{C}_2\text{T}_x/\text{DTAB}$  electrode at the 1<sup>st</sup> (gray lines), the 10<sup>th</sup> (green lines) and the 100<sup>th</sup> (red lines) cycles at  $0.05 \text{ A g}^{-1}$ .

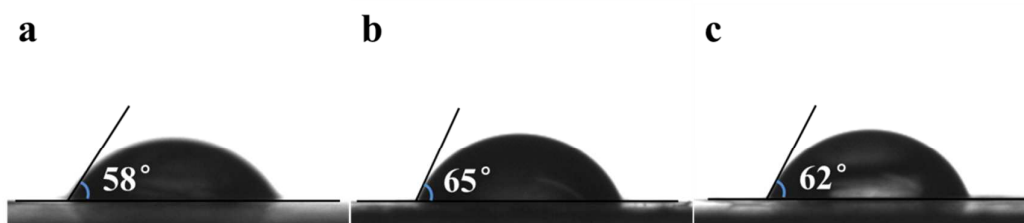

**Figure S7** Digital image of a water drop on paper-like  $\text{Ti}_3\text{C}_2\text{T}_x$  (a),  $\text{Ti}_3\text{C}_2\text{T}_x/\text{SDS}$  (b) and  $\text{Ti}_3\text{C}_2\text{T}_x/\text{CTAB}$  (c). The contact angles were measured to be  $58^\circ$ ,  $65^\circ$  and  $62^\circ$ , respectively.

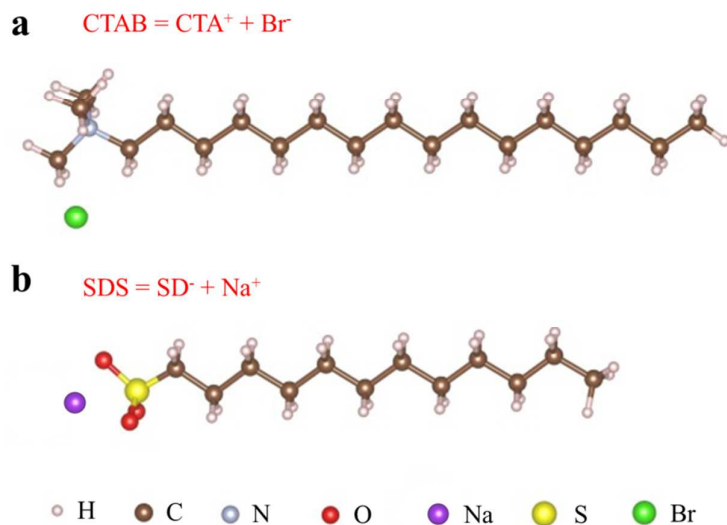

**Figure S8.** Structural schematics of CTAB (a) and SDS (b).

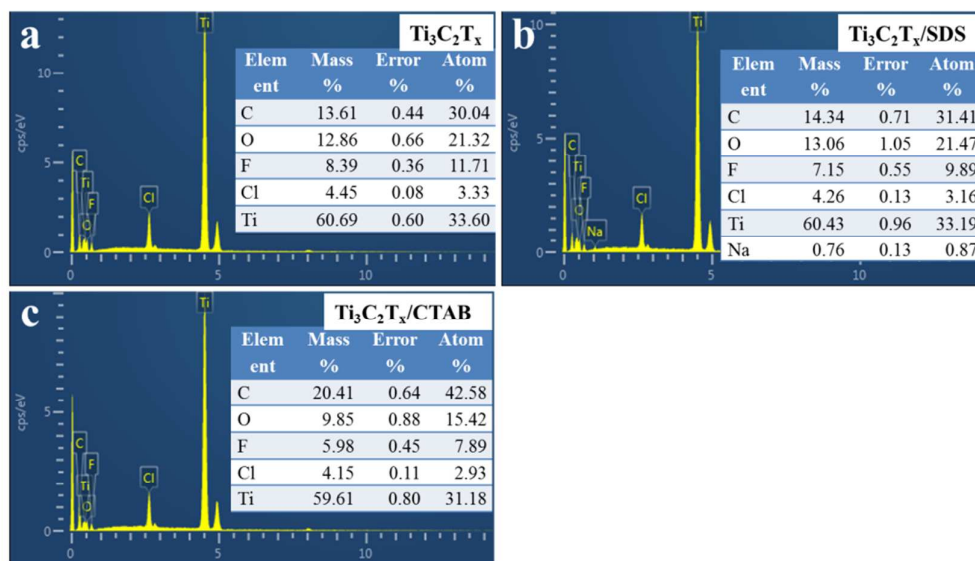

**Figure S9.** Energy-dispersive spectroscopies of paper-like  $\text{Ti}_3\text{C}_2\text{T}_x$  (a),  $\text{Ti}_3\text{C}_2\text{T}_x/\text{SDS}$  (b) and  $\text{Ti}_3\text{C}_2\text{T}_x/\text{CTAB}$  (c).

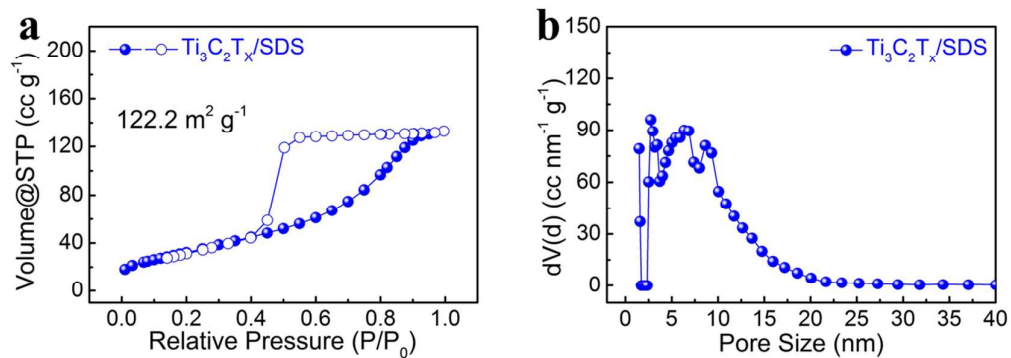

**Figure S10.** a) N<sub>2</sub> adsorption-desorption isotherms and b) pore size distribution curve of Ti<sub>3</sub>C<sub>2</sub>T<sub>x</sub>/SDS paper.

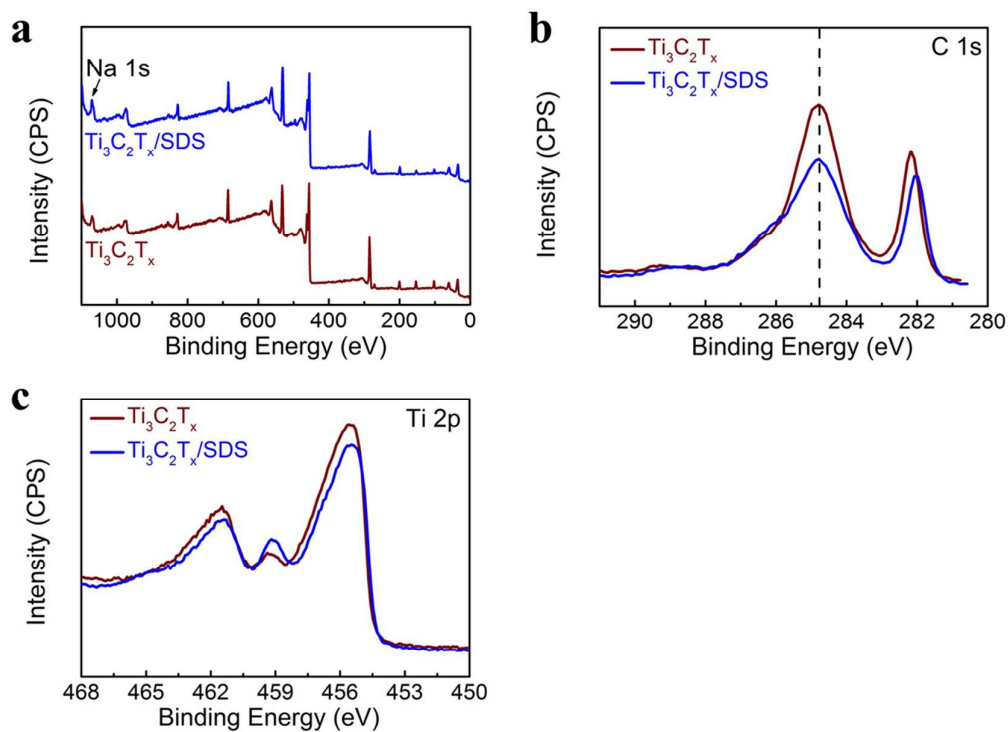

**Figure S11.** XPS spectra of Ti<sub>3</sub>C<sub>2</sub>T<sub>x</sub> and Ti<sub>3</sub>C<sub>2</sub>T<sub>x</sub>/SDS papers: a) full survey spectra, b) C 1s spectra, c) Ti 2p spectra.

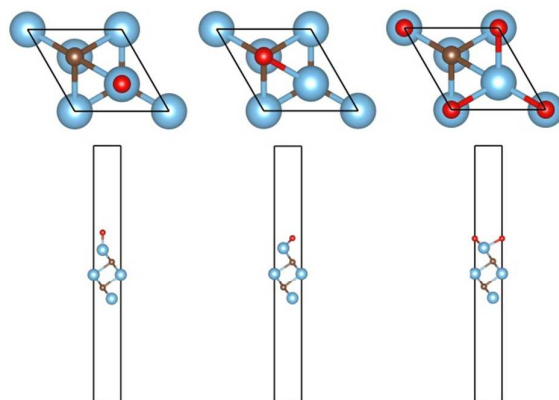

**Figure S12.** Top-view and side-view of O atom adsorbed on Ti<sub>3</sub>C<sub>2</sub> surface at top-site (left), bcc-site (middle) and fcc-site (right).

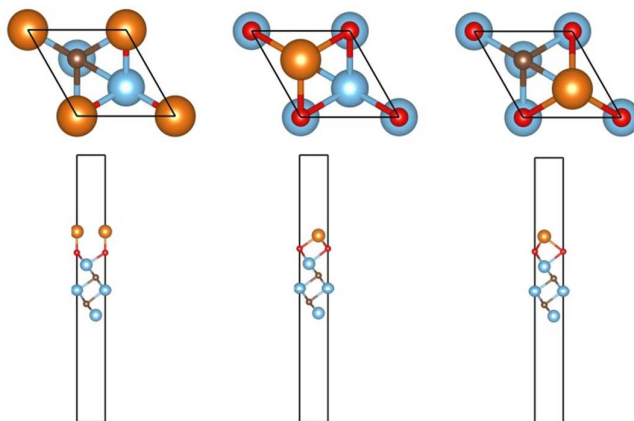

**Figure S13.** Top-view and side-view of Mg atom adsorbed on Ti<sub>3</sub>C<sub>2</sub>O surface at top-site (left), fcc-site (middle) and bcc-site (right).

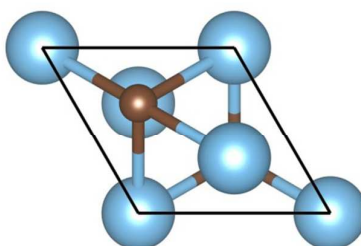

**Figure S14.** Top-view of Ti<sub>3</sub>C<sub>2</sub> crystal structure.

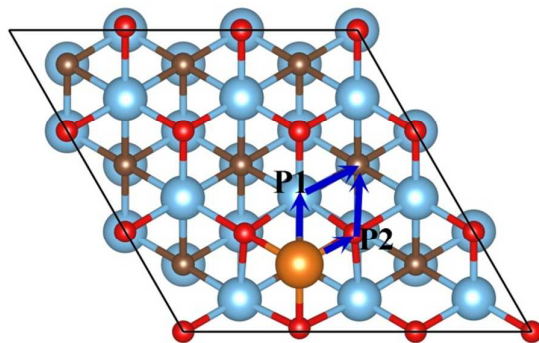

**Figure S15.** Diffusion paths of  $\text{Mg}^{2+}$  on  $\text{Ti}_3\text{C}_2$  surface. As labelled in blue arrows,  $\text{Mg}^{2+}$  has two diffusion paths, *i.e.*, P1 via top-site of Ti atom and P2 via top-site of O atom. Our theoretical results showed that P2 changed to P1 after NEB calculations.

**Table S1.** Adsorption energies (in eV) of O atom adsorbed on  $\text{Ti}_3\text{C}_2$  surface and Mg atom adsorbed on  $\text{Ti}_3\text{C}_2\text{O}$ .

| Adsorption sites                                          | top   | bcc   | fcc   |
|-----------------------------------------------------------|-------|-------|-------|
| $E_{\text{ads}}(\text{O}/\text{Ti}_3\text{C}_2)$          | -5.41 | 7.45  | -8.16 |
| $E_{\text{ads}}(\text{Mg}/\text{Ti}_3\text{C}_2\text{O})$ | -2.39 | -2.31 | -2.63 |

**Table S2.** Bader charge analysis for  $\text{Mg}^{2+}$  and  $\text{CTA}^+$  on  $\text{Ti}_3\text{C}_2\text{O}$  surface. Mg was charged positively, 1.64 electron, in  $\text{Ti}_3\text{C}_2\text{O}/\text{Mg}^{2+}$  system and  $\text{CTA}^+$  was charged positively, 1.04 electron, in  $\text{Ti}_3\text{C}_2\text{O}/\text{Mg}^{2+}$  system, which agree well with experiments. After intercalated  $\text{CTA}^+$ , *i.e.*, in  $\text{Ti}_3\text{C}_2\text{O}/\text{CTA}^+/\text{Mg}^{2+}$  system, bader charge of  $\text{Mg}^{2+}$  and  $\text{CTA}^+$  reduced to 1.38 and 0.81 electron, respectively.

|                                                             | $\text{Ti}_3\text{C}_2\text{O}$ | $\text{CTA}^+$ | $\text{Mg}^{2+}$ |
|-------------------------------------------------------------|---------------------------------|----------------|------------------|
| $\text{Ti}_3\text{C}_2\text{O}/\text{Mg}^{2+}$              | -1.64                           |                | 1.64             |
| $\text{Ti}_3\text{C}_2\text{O}/\text{CTA}^+$                | -1.04                           | 1.04           |                  |
| $\text{Ti}_3\text{C}_2\text{O}/\text{CTA}^+/\text{Mg}^{2+}$ | -2.19                           | 0.81           | 1.38             |



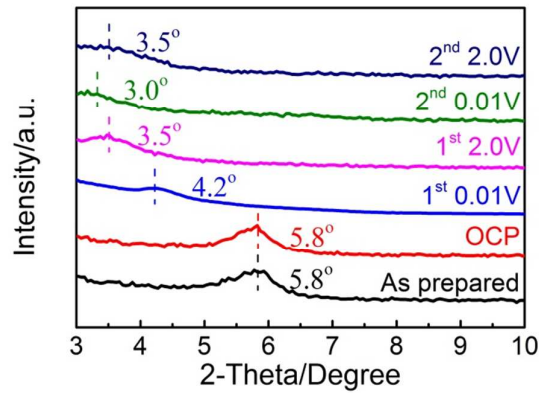

**Figure S16.** XRD patterns of  $\text{Ti}_3\text{C}_2\text{T}_x/\text{CTAB}$  electrode at different GCD states.

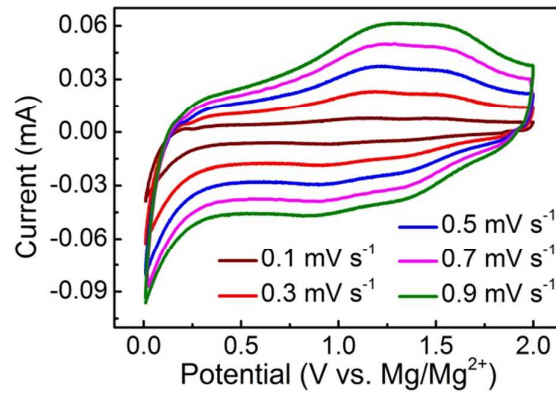

**Figure S17.** CV curves of the Mg battery using  $\text{Ti}_3\text{C}_2\text{T}_x/\text{CTAB}$  cathode at different scan rates from 0.1 to 0.9  $\text{mV s}^{-1}$ .

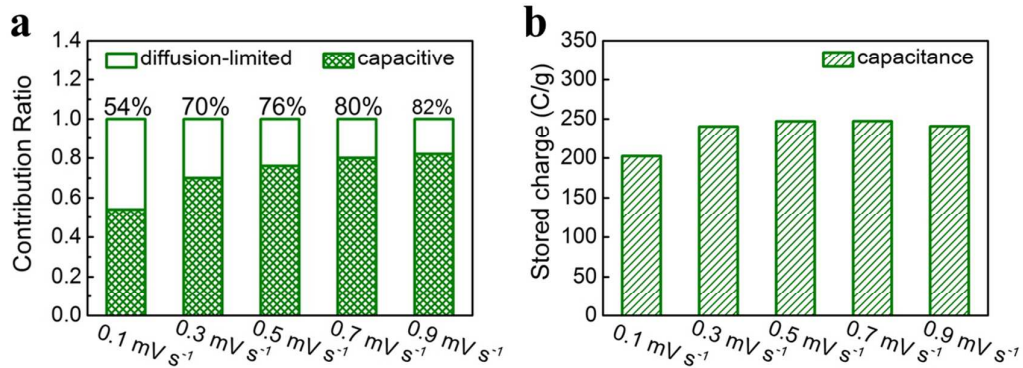

**Figure S18.** a) Separation of the capacitive and diffusion-limited currents. b) Corresponding dependence of the stored charge by capacitive contribution as a function of the scan rate.

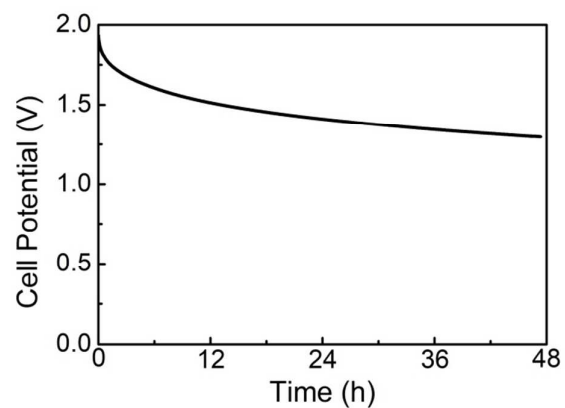

**Figure S19.** Decay of open circuit potential of the Mg battery using  $\text{Ti}_3\text{C}_2\text{T}_x/\text{CTAB}$  cathode.
